# Supplementary material for: Noninvasive theranostic imaging of HSV-TK/GCV suicide gene therapy in liver cancer by folate-targeted quantum dot-based liposomes
Source: Royal Society of Chemistry journal article supplement (doi:10.1039/c5bm00077g), 2015-01-01
Supplement: c5bm00077g1.pdf [file c5bm00077g1.pdf]

## **Noninvasive Theranostic Imaging of HSV-TK/GCV Suicide Gene Therapy in Liver Cancer by Folate-targeted Quantum Dot-based Liposomes**

Dan Shao<sup>a,†</sup>, Jing Li<sup>a,†</sup>, Yue Pan<sup>a</sup>, Xin Zhang<sup>a</sup>, Xiao Zheng<sup>a</sup>, Zheng Wang<sup>a</sup>, Ming Zhang<sup>a</sup>, Hong Zhang<sup>\*b</sup> and Li Chen<sup>\*a,c</sup>

<sup>a</sup>Department of Pharmacology, Nanomedicine Engineering Laboratory of Jilin Province, College of Basic Medical Sciences, Jilin University, Changchun 130021, China. E-mail: chenl@jlu.edu.cn.

<sup>b</sup> Van' t Hoff Institute for Molecular Sciences, University of Amsterdam, Science Park 904, 1098 XH Amsterdam, The Netherlands. E-mail: h.zhang@uva.nl.

<sup>c</sup> School of Nursing, Jilin University, Changchun 130021, China.

## SMMC-7721

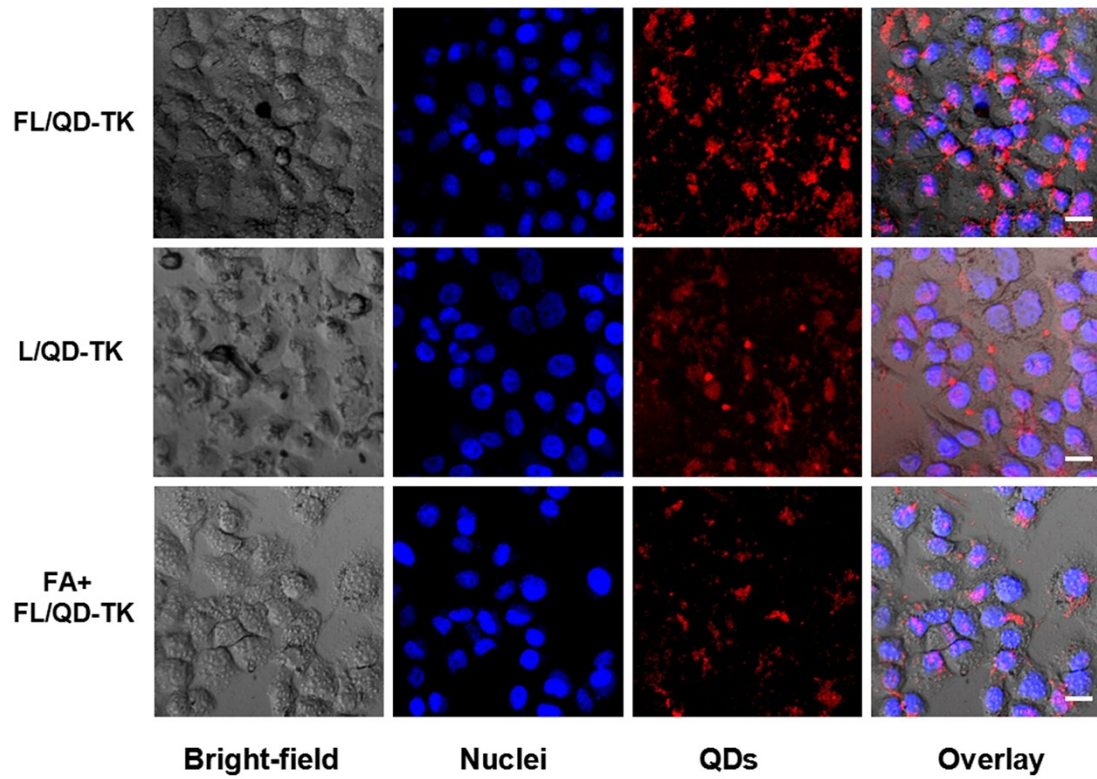

**Fig.S1** Cell uptake of FL/QD-TK in SMMC-7721 cells. Laser confocal scanning microscopic images of folate receptor positive SMMC-7721 cells incubated with targeted liposome FL/QD-TK, non-targeted liposome L/QD-TK and FL/QD-TK+FA. Red fluorescence: Quantum dots, Nuclei: stained blue with Hoechst 33342, Scale bars at 10  $\mu\text{m}$ .

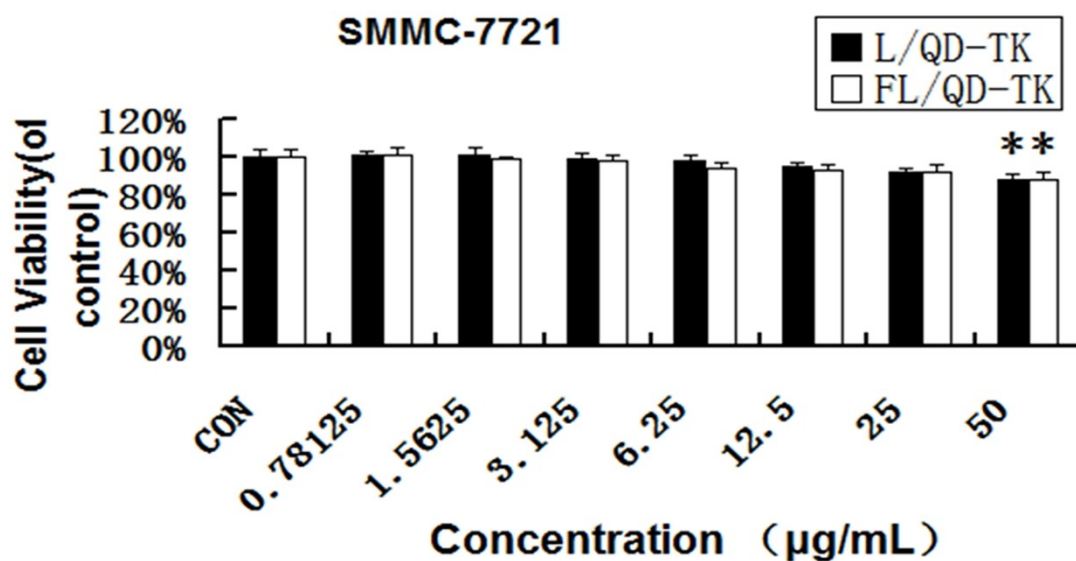

**Fig. S2** Effect of FL/QD-TK on cell viability. Cell viability in SMMC-7721 during 96h-treatment with the different concentration of FL/QD-TK and L/QD-TK were measured by MTT assay. The data represent three separated experiments. Mean values  $\pm$  SD. \* $P < 0.05$  versus control group.

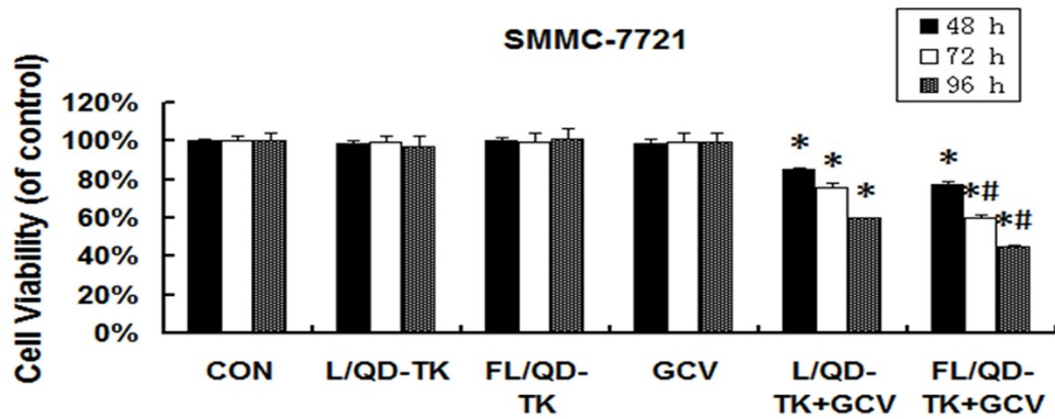

**Fig. S3** Antitumor effect of FL/QD-TK plus GCV on cell viability. Cell viability in SMMC-7721 during 48h, 72h, 96h-treatment with the 12.5  $\mu\text{g/ml}$  of FL/QD-TK and L/QD-TK with or without 10  $\mu\text{g/ml}$  GCV were measured by MTT assay. The data represent three separated experiments. Mean values  $\pm$  SD.\*P < 0.05 versus control group, #P < 0.01 stands for FL/QD-TK versus L/QD-TK group.
